# Supplementary material for: Copper(ii) complexes of a polydentate imidazole-based ligand. pH effect on magnetic coupling and catecholase activity
Source: Royal Society of Chemistry journal article supplement (doi:10.1039/b714283h), 2008-01-01
Supplement: b714283h.pdf [file b714283h.pdf]

SUPPORTING INFORMATION  
accompanying

**Copper(II) complexes of a polydentate imidazole-based ligand. pH effect on magnetic coupling and catecholase activity**

Edgar Mijangos<sup>a</sup>, Jan Reedijk<sup>b</sup>, Laura Gasque<sup>a\*</sup>

<sup>a</sup> Departamento de Química Inorgánica y Nuclear, Facultad de Química, Universidad Nacional Autónoma de México. Ciudad Universitaria, México D.F. 04510, (México).

<sup>b</sup> Leiden Institute of Chemistry, Leiden University. P.O. Box 9502, 2300 RA, Leiden (The Netherlands)

**Table of Contents**

---

|                                                                                                                      |          |
|----------------------------------------------------------------------------------------------------------------------|----------|
| <b>Figure S1.</b> EPR spectra of <b>1</b> and <b>2</b> .                                                             | <b>2</b> |
| <b>Figure S2.</b> Diffuse reflectance spectra of <b>1</b> and <b>2</b> .                                             | <b>2</b> |
| <b>Figure S3.</b> Possible protonation degrees of the ligand H <sub>6</sub> Valbiim.                                 | <b>3</b> |
| <b>Figure S4.</b> Species distribution diagram for H <sub>6</sub> Valbiim.                                           | <b>3</b> |
| <b>Figure S5.</b> Changes in chemical shifts of H <sub>6</sub> Valbiim as function of the pH.                        | <b>4</b> |
| <b>Figure S6.</b> Initial rates of H <sub>2</sub> DTBC oxidation in MeOH/H <sub>2</sub> O and MeCN/H <sub>2</sub> O. | <b>5</b> |
| <b>Figure S7.</b> Lineweaver-Burk plots.                                                                             | <b>6</b> |
| <b>Figure S8.</b> CV's of dioxygen in MeOH/H <sub>2</sub> O and MeCN/H <sub>2</sub> O.                               | <b>6</b> |
| <b>Figure S9.</b> IR spectra of <b>1</b> and <b>2</b> .                                                              | <b>7</b> |
| <b>Figure S10.</b> UV-Vis titration in MeOH.                                                                         | <b>7</b> |

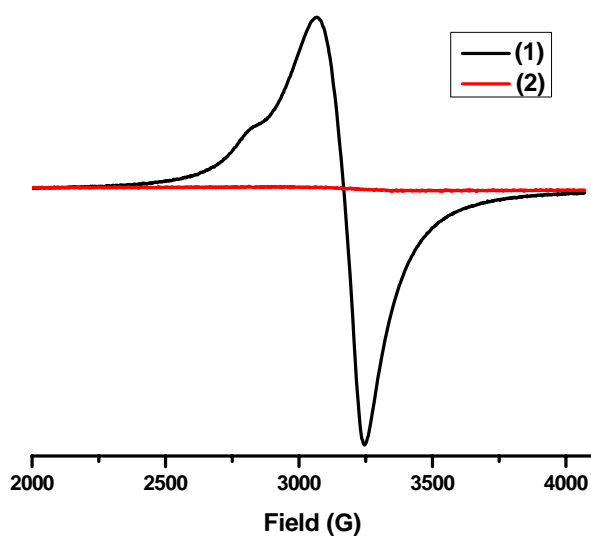

**Figure S1.** Powder EPR spectra at room temperature of the complexes (Black) **1**,  $[\text{Cu}_4(\text{H}_2\text{Valbium})(\text{H}_2\text{O})_{10}](\text{BF}_4)_4 \cdot 6\text{H}_2\text{O}$  and (Red) **2**,  $[\text{Cu}_4(\text{Valbium})(\mu\text{-OH})_2(\text{H}_2\text{O})_4] \cdot 5\text{H}_2\text{O}$

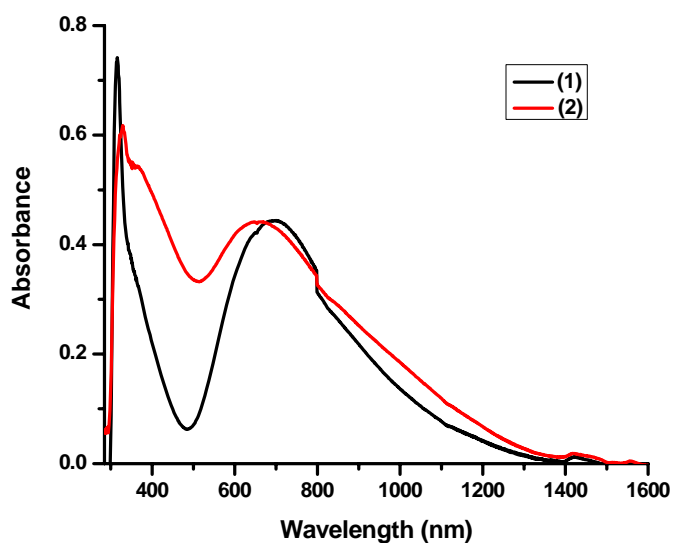

**Figure S2.** Diffuse reflectance spectra of the complexes (Black) **1**,  $[\text{Cu}_4(\text{H}_2\text{Valbium})(\text{H}_2\text{O})_{10}](\text{BF}_4)_4 \cdot 6\text{H}_2\text{O}$  and (Red) **2**,  $[\text{Cu}_4(\text{Valbium})(\mu\text{-OH})_2(\text{H}_2\text{O})_4] \cdot 5\text{H}_2\text{O}$ . The abnormality near 800 nm is due to change of detector.

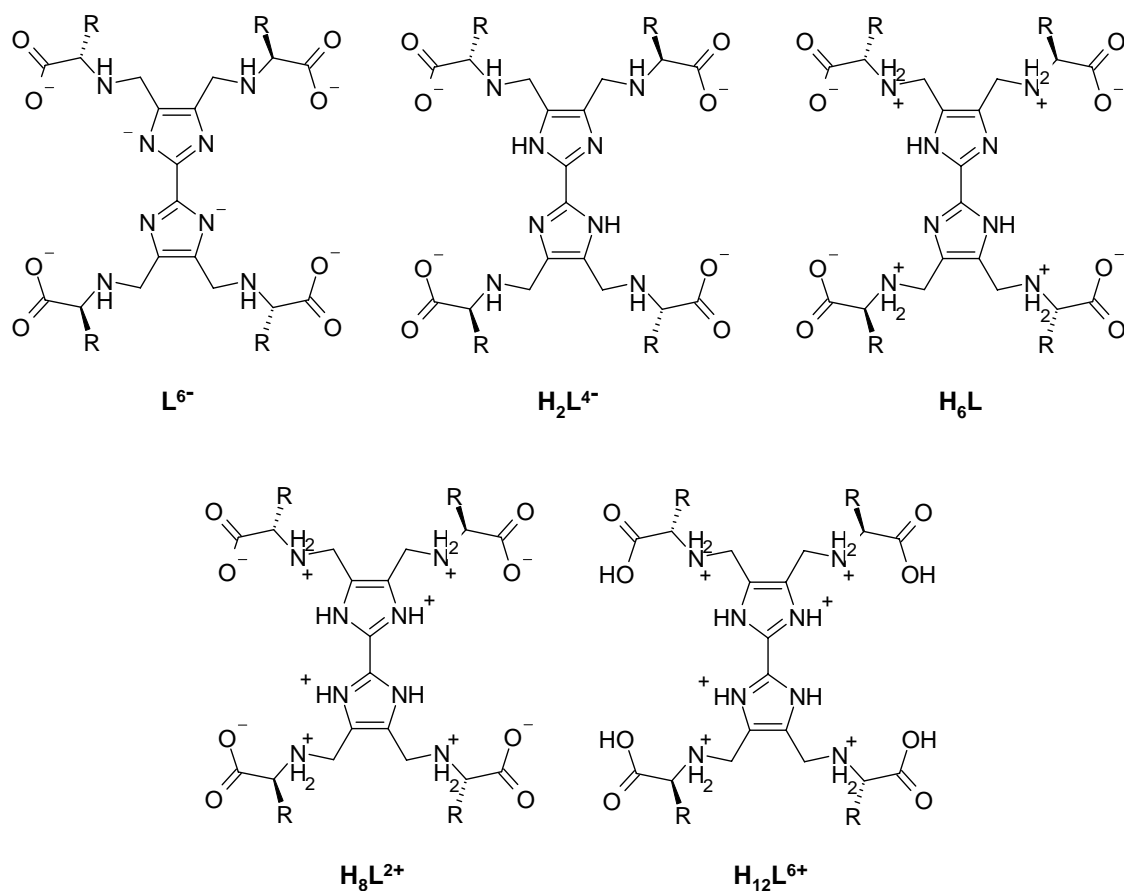

**Figure S3.** Some of the different possible protonation degrees of the ligand *H<sub>6</sub>Valbiim*.

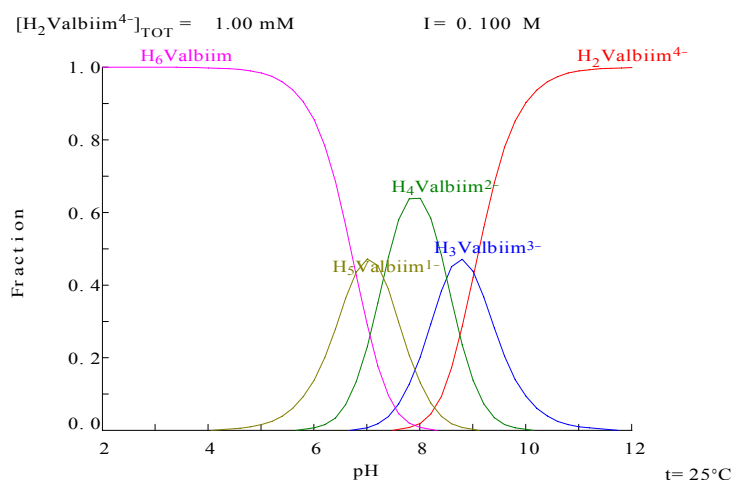

**Figure S4.** Species distribution diagram as a function of pH for *H<sub>6</sub>Valbiim* in aqueous solution.

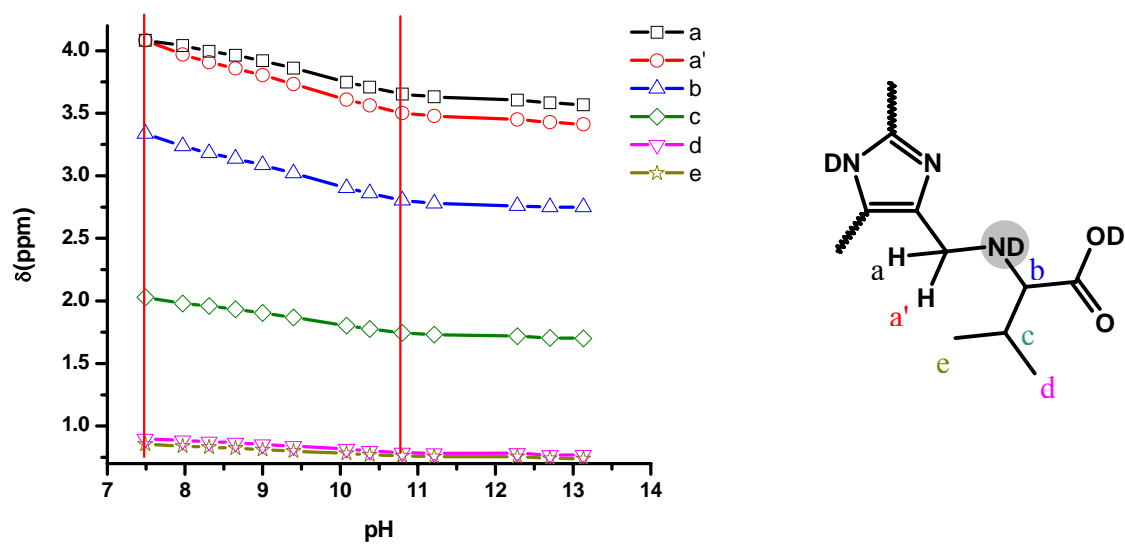

**Figure S5.** Changes in chemical shifts of selected  $^1\text{H}$ NMR signals of  $\text{H}_6\text{Valbim}$  as function of the pH.

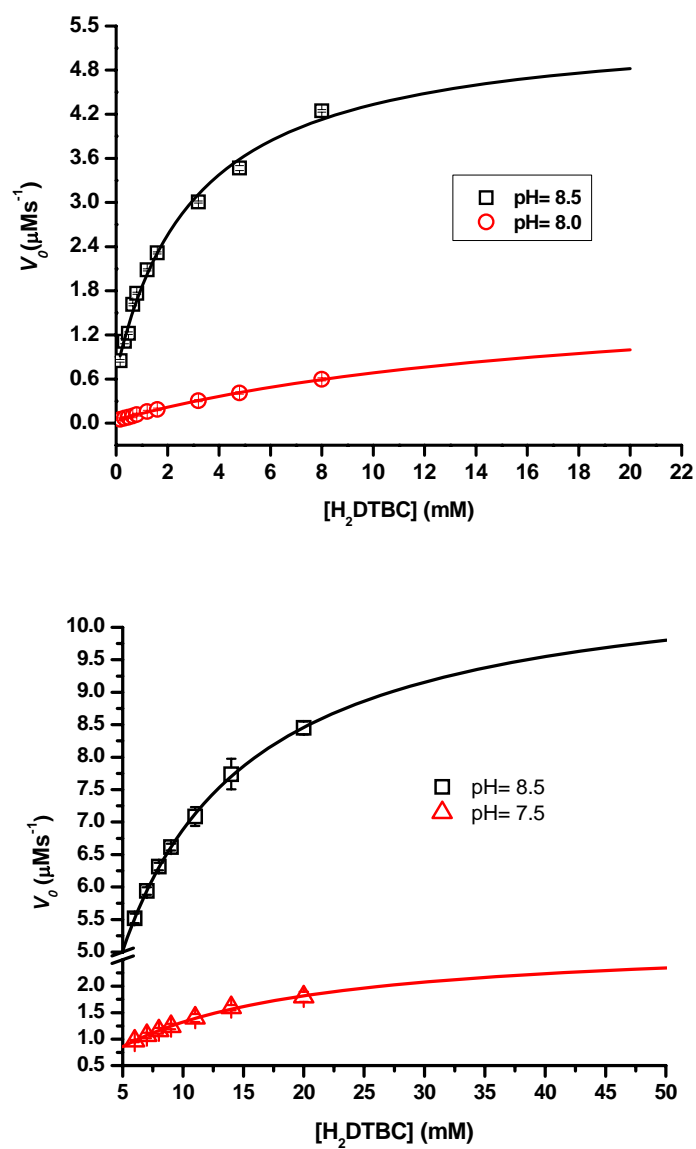

**Figure S6.** Dependence of the reaction rates on the  $\text{H}_2\text{DTBC}$  concentrations for the oxidation catalyzed by  $\text{Cu}_4\text{Valbiim}$  in (up)  $\text{MeOH}/\text{H}_2\text{O}$  and (down)  $\text{MeCN}/\text{H}_2\text{O}$ .

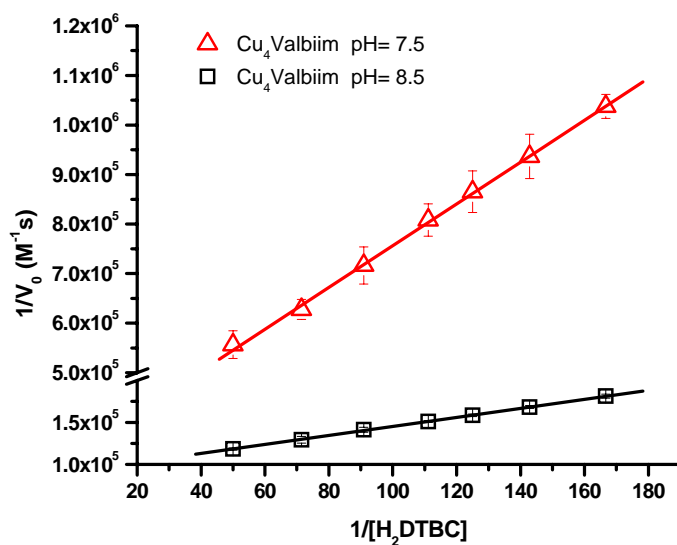

**Figure S7.** Lineweaver-Burk plot for aerobic oxidation of  $H_2DTBC$  by complex  $Cu_4Valbiim$  in  $MeCN/H_2O$ .

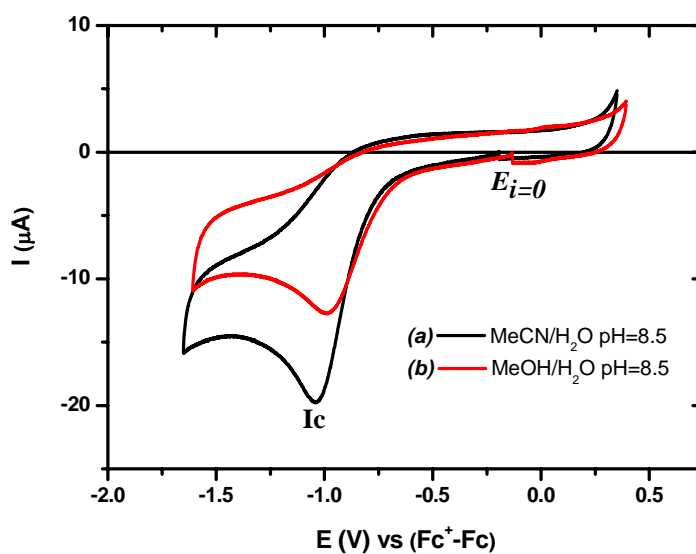

**Figure S8.** Cyclic voltammograms of atmospheric  $O_2$  saturated solutions of 0.1 M HEPES  $pH = 8.5$  in  $MeCN/H_2O$ ; 1:1 (black line) and  $MeOH/H_2O$ ; 1:1 (red line) at 78.1 KPa. Scan rate  $0.1 V s^{-1}$ . Vitreous carbon disk ( $7.1 mm^2$ ).  $Ag/AgBr$ , 0.1 M  $Bu_4NBr$  reference electrode.

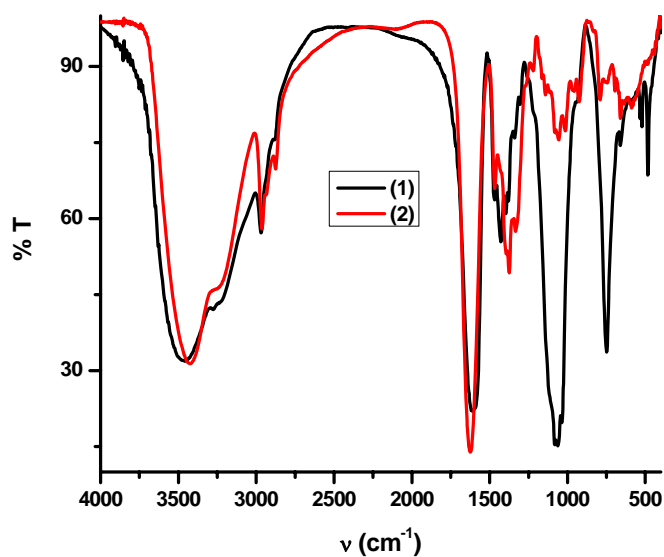

**Figure S9.** IR spectra of the complexes (Black) **1**,  $[\text{Cu}_4(\text{H}_2\text{Valbium})(\text{H}_2\text{O})_{10}](\text{BF}_4)_4 \cdot 6\text{H}_2\text{O}$  and (Red) **2**,  $[\text{Cu}_4(\text{Valbium})(\mu\text{-OH})_2(\text{H}_2\text{O})_4] \cdot 5\text{H}_2\text{O}$  in KBr pellet.

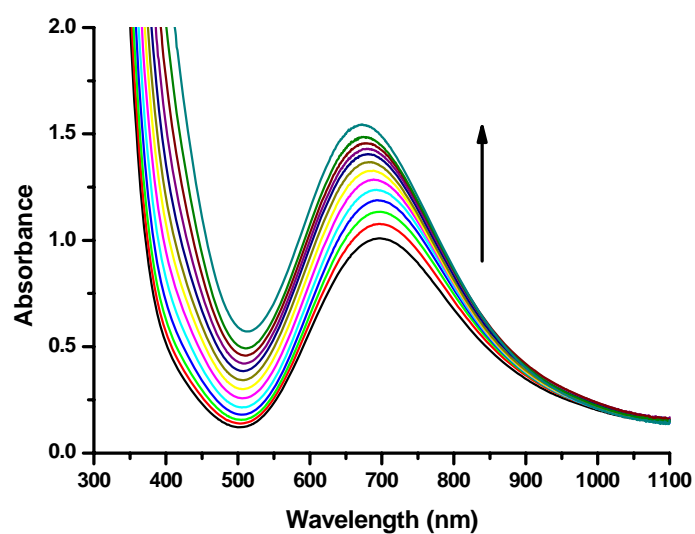

**Figure S10.** UV-Vis spectra of  $[\text{Cu}_4\text{Valbium}]$  (5 mM) in methanol solution at 25 °C as a function of  $\text{NBu}_4\text{OH}$  added. The first line is the spectrum of a solution  $4\text{Cu}:\text{H}_6\text{Valbium}$  and the subsequent are the spectra of this solution plus 0.5 to 6 eq.
